# Supplementary material for: Two unusual nanosized Nd3+-substituted selenotungstate aggregates simultaneously comprising lacunary Keggin and Dawson polyoxotungstate segments
Source: Royal Society of Chemistry journal article supplement (doi:10.1039/d0nr04051g), 2020-01-01
Supplement: d0nr04051g1.pdf [file d0nr04051g1.pdf]

## Two unusual nanosized Nd<sup>3+</sup>-substituted selenotungstate aggregates simultaneously comprising lacunary Keggin and Dawson polyoxotungstate segments

Hailou Li,<sup>a,b</sup> Chen Lian,<sup>b</sup> Lijuan Chen,<sup>a,\*</sup> Junwei Zhao,<sup>a,\*</sup> and Guo-Yu Yang<sup>b,\*</sup>

<sup>a</sup>Henan Key Laboratory of Polyoxometalate Chemistry, College of Chemistry and Chemical Engineering, Henan University, Kaifeng, Henan 475004, China

<sup>b</sup>MOE Key Laboratory of Cluster Science, School of Chemistry and Chemical Engineering, Beijing Institute of Technology, Beijing 102488, China

### Supporting Information

**Fig. S1** Experimental and simulated PXRD patterns of **1** and **2**.

**Fig. S2** (a) The POA of  $[(W_3Eu_2(H_2O)_8AsO_8(OH))(B-\alpha-AsW_9O_{33})_2]_2^{16-}$ . (b) The POA of  $\{[W_3Nd_2(H_2O)_3(NO_3)O_6](B-\alpha-SeW_9O_{33})_2(\alpha-Se_2W_{14}O_{52})\}^{17-}$ . (c) The  $\{Eu_2W_3\}$  cluster. (d) The  $\{Nd_2W_3\}$  cluster.

**Fig. S3** (a) The POA of **1**. (b) The trimer of  $\{Se_6W_{35}\}$ .

**Fig. S4** (a) Simplified view of the stacking of **1a** POAs along the *b* axis. (b) Simplified view of the stacking of **1a** POAs along the *c* axis.

**Fig. S5** (a) The POA of  $\{(Pd_5Se_2)(W_3)(B-\alpha-SeW_9)(\beta-Se_2W_{14})\}_2$ . (b) The POA of  $\{[W_2Nd_2(H_2O)_8O_6(OH)_2(\beta-Se_2W_{14}O_{52})][W_3Nd_2(H_2O)_6O_7(SeW_9O_{33})_2]_2\}^{20-}$ . (c) and (d) The lacunary Keggin-type  $[B-\alpha-SeW_9O_{33}]^{8-}$  and Dawson-type  $[\beta-Se_2W_{14}O_{52}]^{12-}$  segments.

**Fig. S6** (a) Simplified view of the stacking of **2a** POAs along the *b* axis. (b) Simplified view of the stacking of **2a** POAs along the *c* axis.

**Fig. S7** (a-b) TGA curves of **1** and **2**.

**Fig. S8** (a-b) IR spectra of **1** and **2**.

**Fig. S9** Comparison of IR spectra of the fresh **2** (fresh), the catalyst after the first cycle (1), the catalyst after the second cycle (2), the catalyst after the third cycle (3), the catalyst after the fourth cycle (4) and the catalyst after the fifth cycle (5).

**Fig. S10** The possible mechanism for oxidation of thioethers catalyzed by **2**.

**Table S1.** The results of BVS calculations of all O atoms in **1a**.

**Table S2.** The results of BVS calculations of all O atoms in **2a**.

**Table S3.** Comparison of some POM-based catalysts for the catalytic oxidation of MPS with **2**.

All chemicals were commercially purchased and used without further purification. C, H and N elements were measured on a Vario EL Cube CHNS analyzer. The contents of Na, K, W, Nd, and Se elements were measured by inductively coupled plasma atomic emission spectrometry (ICP–AES) on a Perkin–Elmer Optima 2000 ICP–AES spectrometer. IR spectra were recorded from solid sample palletized with KBr on a Perkin–Elmer FT–IR spectrometer in the range 400–4000  $\text{cm}^{-1}$ . Powder X-ray diffraction (PXRD) patterns were collected on a Bruker D8 ADVANCE instrument with Cu K $\alpha$  radiation ( $\lambda = 1.54056 \text{ \AA}$ ). TG analyses were performed under a  $\text{N}_2$  atmosphere on a Mettler–Toledo TGA/SDTA 851<sup>e</sup> instrument with a heating rate of 20  $^\circ\text{C min}^{-1}$  from 30 to 1000  $^\circ\text{C}$ . The GC chromatograms were obtained on a SHIMADZU GC-2014C.

### X-ray crystallography

The suitable crystals of **1** and **2** were picked and sealed to a glass tube closed at both ends. Intensity data for **1** and **2** were collected on a Bruker APEX II CCD detector at 296(2) K with Mo K $\alpha$  monochromated radiation ( $\lambda = 0.71073 \text{ \AA}$ ). Direct methods were used to solve their structures and locate the heavy atoms using the SHELXTL–97 program package.<sup>1-2</sup> The remaining atoms were found from successive full-matrix least-squares refinements on  $F^2$  and Fourier syntheses. Lorentz polarization and SADABS corrections were applied. All hydrogen atoms attached to carbon and nitrogen atoms were geometrically placed and refined isotropically as a riding model using the default SHELXTL parameters. There are still solvent accessible voids in the check cif report of crystal structure, which suggest that some solvent water molecules should exist in the structure of **2** that can't be found from the weak residual electron peaks. These solvent molecules are highly disordered, and attempts to locate and refine them were unsuccessful. On the basis of elemental analysis and TG analysis, 56 lattice water molecules were directly added to the molecular formula. The crystallographic data and structure refinement parameters for **1** and **2** are listed in Table 1.

### Thermogravimetric (TG) analysis

To determine the number of lattice water molecules of **1** and **2**, the TG analyses of **1** and **2** have been investigated under the flowing  $\text{N}_2$  atmosphere with a heating rate of 10  $^\circ\text{C min}^{-1}$  from 30 to 1000  $^\circ\text{C}$ . As shown in Fig. S7a, **1** exhibits a two-step weight loss process. From 30 to 250  $^\circ\text{C}$ , the first weight loss of 6.05 % (calcd. 6.12%) for **1** corresponds to the release of 35 lattice water molecules. Subsequently, an apparent weight loss ranging from 250 to 700 is 5.34 % (calcd. 5.29%) for **1**, which is attributable to the loss of 3 coordination water molecules, 1  $\text{NO}_2$  and 4  $\text{SeO}_2$ . Differently, **2** presents a three-step weight loss process (Fig. S7b). From 25 to 250  $^\circ\text{C}$ , the first weight loss of 8.67% (calcd. 8.59%) is due to the release of 84 lattice water molecules. The second weight loss between 250 and 570  $^\circ\text{C}$  is 4.77% (calcd. 4.76%), which is assigned to the liberation of 20 coordination water molecules, the dehydration of 16 protons and 2 hydroxyl groups, and the removal of 7 dimethylamine groups. The third weight between 570 and 700  $^\circ\text{C}$  is 3.98% (calcd. 3.78%), which is ascribed to the loss of 6  $\text{SeO}_2$ . Apparently, the experimental values coincide with the theoretical values.

### FT-IR spectra

IR spectra of **1** and **2** have been recorded between 4000–400  $\text{cm}^{-1}$  by utilizing KBr pellets (Fig. S8). In the low-wavenumber region, IR spectra of **1** and **2** show the characteristic vibration patterns derived from the ST skeletons, four absorption bands attributable to  $\nu(\text{W–O}_t)$ ,  $\nu(\text{Se–O})$ ,  $\nu(\text{W–O}_b)$  and  $\nu(\text{W–O}_c)$  are observed at 962, 885, 845 and 773  $\text{cm}^{-1}$  for **1**, and 965, 888, 862 and 781  $\text{cm}^{-1}$  for **2**, respectively. In the high-wavenumber region, the stretching and bending absorption vibrations of O–H groups are respectively centered at 3414  $\text{cm}^{-1}$  and 1628  $\text{cm}^{-1}$  for **1**,

3425  $\text{cm}^{-1}$  and 1632  $\text{cm}^{-1}$  for **2**. The IR spectrum of **2** has three weak bands at 3147, 2792, and 1464  $\text{cm}^{-1}$ , which are attributed to the N–H, C–H and C–N stretching vibrations respectively, meaning the presence of dimethylamine components.

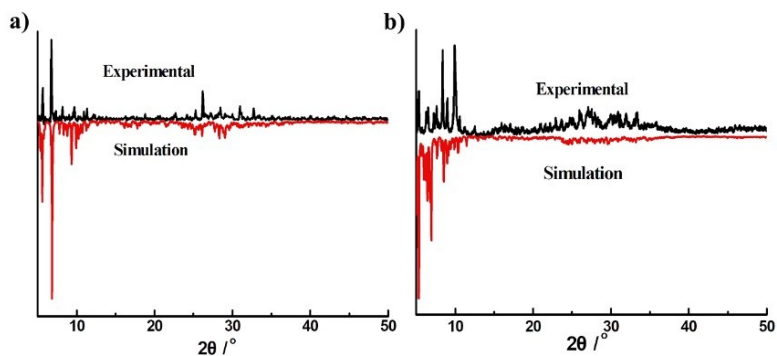

**Fig. S1** Experimental and simulated PXRD patterns of **1** and **2**.

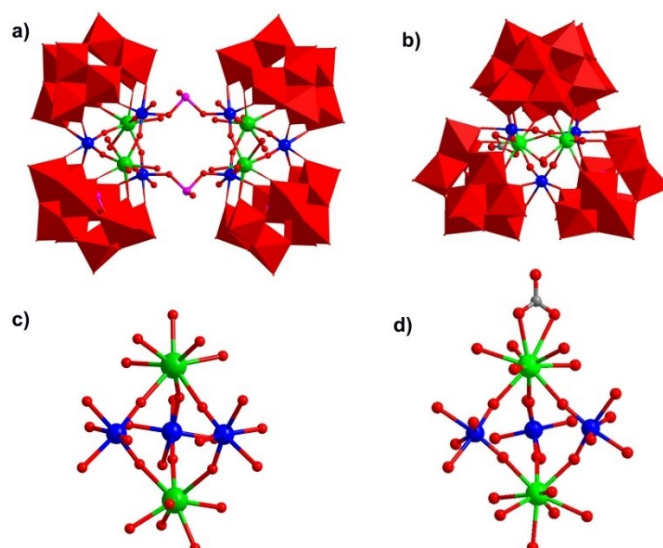

**Fig. S2** (a) The POA of  $[(\text{W}_3\text{Eu}_2(\text{H}_2\text{O})_8\text{AsO}_8(\text{OH}))(\text{B}-\alpha\text{-AsW}_9\text{O}_{33})_2]^{16-}$ . (b) The POA of  $\{[\text{W}_3\text{Nd}_2(\text{H}_2\text{O})_3(\text{NO}_3)\text{O}_6](\text{B}-\alpha\text{-SeW}_9\text{O}_{33})_2(\alpha\text{-Se}_2\text{W}_{14}\text{O}_{52})\}^{17-}$ . (c) The  $\{\text{Eu}_2\text{W}_3\}$  cluster. (d) The  $\{\text{Nd}_2\text{W}_3\}$  cluster.

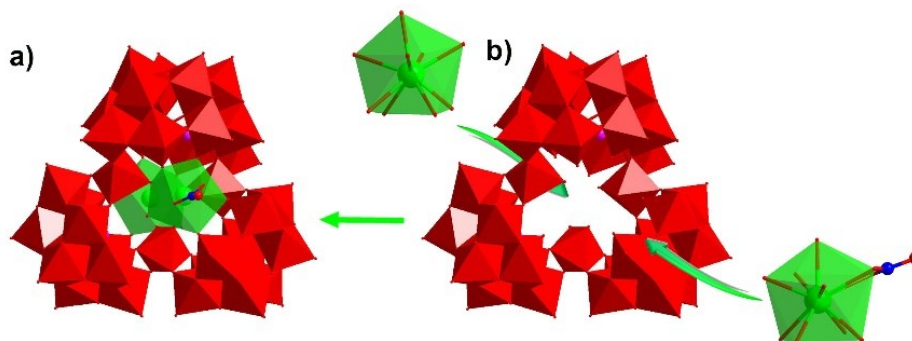

**Fig. S3** (a) The POA of **1**. (b) The trimer of  $\{\text{Se}_6\text{W}_{35}\}$ .

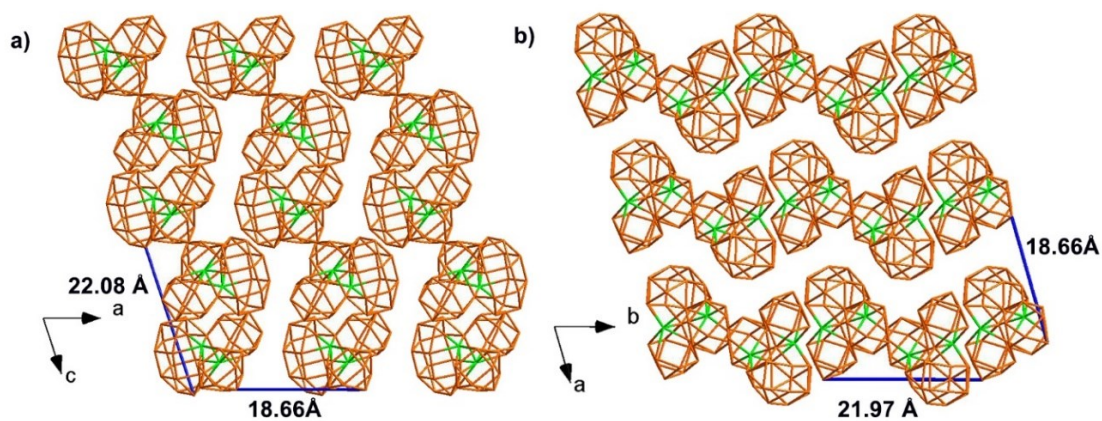

**Fig. S4** (a) Simplified view of the stacking of **1a** POAs along the *b* axis. (b) Simplified view of the stacking of **1a** POAs along the *c* axis.

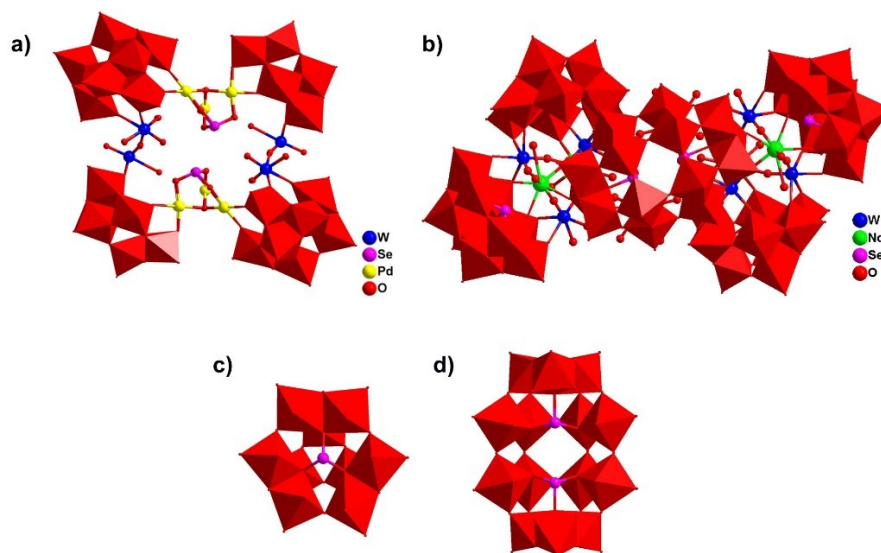

**Fig. S5** (a) The POA of  $\{(Pd_5Se_2)(W_3)(B-\alpha-SeW_9)(\beta-Se_2W_{14})\}_2$ . (b) The POA of  $\{[W_2Nd_2(H_2O)_8O_6(OH)_2 (\beta-Se_2W_{14}O_{52})][W_3Nd_2(H_2O)_6O_7(SeW_9O_{33})_2]_2\}^{20-}$ . (c) and (d) The lacunary Keggin-type  $[B-\alpha-SeW_9O_{33}]^{8-}$  and Dawson-type  $[\beta-Se_2W_{14}O_{52}]^{12-}$  segments.

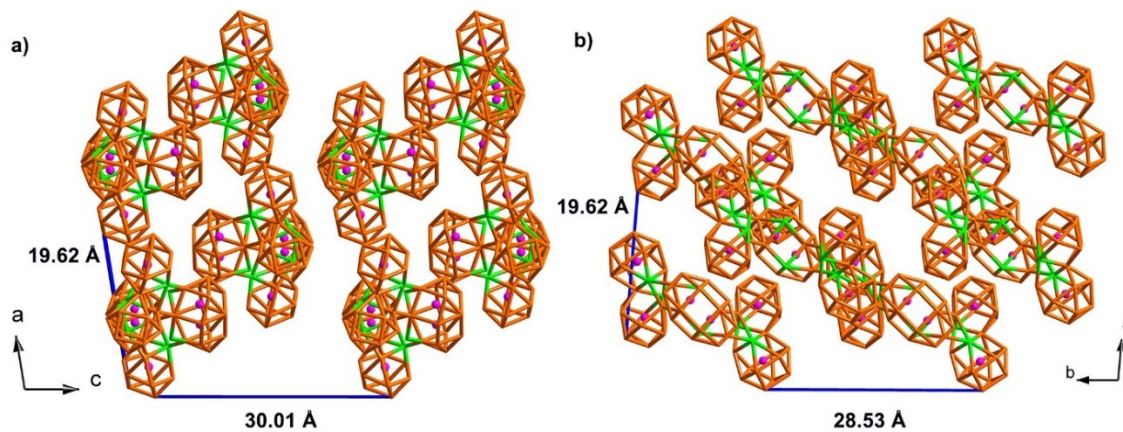

**Fig. S6** (a) Simplified view of the stacking of **2a** POAs along the *b* axis. (b) Simplified view of the stacking of **2a** POAs along the *c* axis.

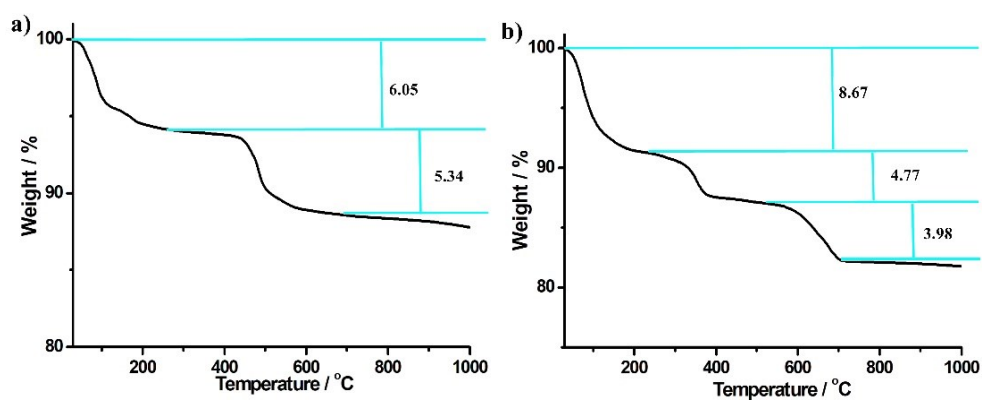

Fig. S7. (a-b) TGA curves of 1 and 2.

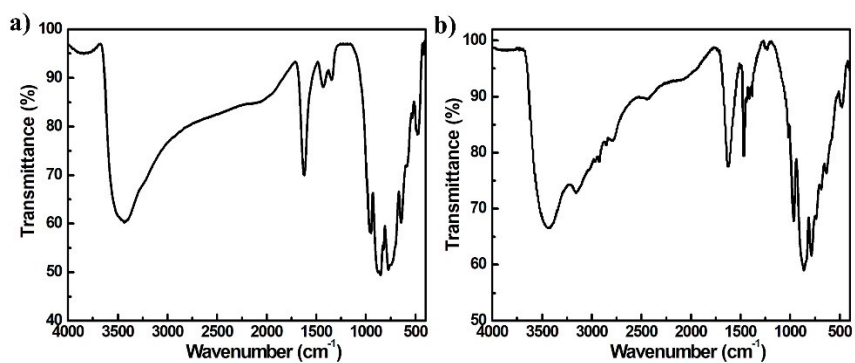

Fig. S8 (a-b) IR spectra of 1 and 2.

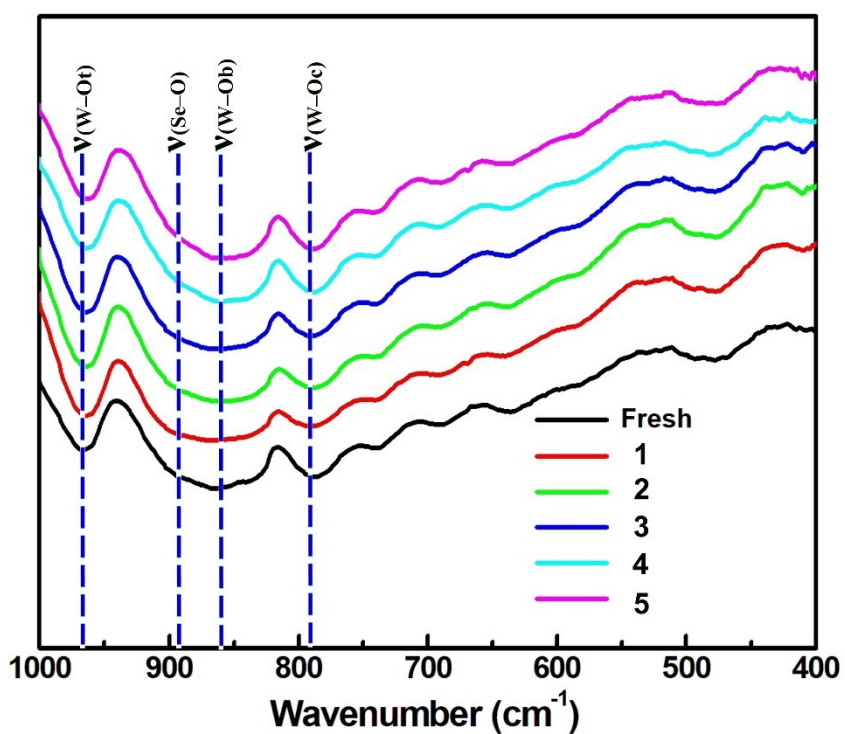

Fig. S9 Comparison of IR spectra of the fresh 2 (fresh), the catalyst after the first cycle (1), the catalyst after the second cycle (2), the catalyst after the third cycle (3), the catalyst after the fourth cycle (4) and the catalyst after the fifth cycle (5).



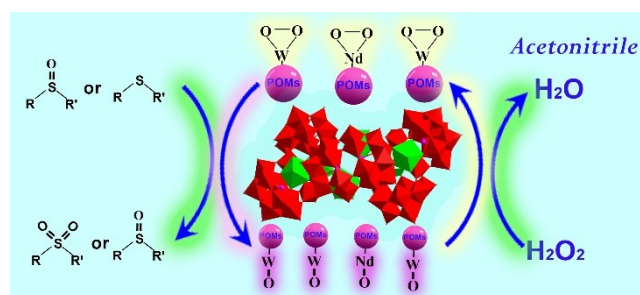

**Fig. S10** The possible mechanism for oxidation of thioethers catalyzed by **2**.

**Table S1.** The results of BVS calculations of all O atoms in **1a**.

| Atom | BVS   | Atom | BVS   | Atom | BVS   |
|------|-------|------|-------|------|-------|
| O1   | 1.920 | O2   | 1.750 | O3   | 1.749 |
| O4   | 2.170 | O5   | 1.859 | O6   | 1.875 |
| O7   | 1.957 | O8   | 1.703 | O9   | 2.004 |
| O10  | 2.268 | O11  | 1.928 | O12  | 1.934 |
| O13  | 1.979 | O14  | 2.003 | O15  | 1.736 |
| O16  | 1.991 | O17  | 1.908 | O18  | 1.957 |
| O19  | 1.827 | O20  | 2.057 | O21  | 1.876 |
| O22  | 1.808 | O23  | 1.984 | O24  | 2.027 |
| O25  | 2.160 | O26  | 1.982 | O27  | 1.979 |
| O28  | 1.848 | O29  | 1.798 | O30  | 1.802 |
| O31  | 2.185 | O32  | 1.726 | O33  | 1.849 |
| O34  | 1.872 | O35  | 1.703 | O36  | 1.703 |
| O37  | 2.061 | O38  | 1.952 | O39  | 2.008 |
| O40  | 2.044 | O41  | 2.079 | O42  | 2.009 |
| O43  | 1.990 | O44  | 1.867 | O45  | 1.995 |
| O46  | 2.114 | O47  | 1.819 | O48  | 2.045 |
| O49  | 2.036 | O50  | 2.079 | O51  | 2.050 |
| O52  | 2.063 | O53  | 1.875 | O54  | 2.152 |
| O55  | 2.044 | O56  | 1.915 | O57  | 1.809 |
| O58  | 1.963 | O59  | 1.797 | O60  | 2.053 |
| O61  | 2.003 | O62  | 1.882 | O63  | 1.700 |
| O64  | 1.947 | O65  | 2.008 | O66  | 1.735 |
| O67  | 1.932 | O68  | 2.114 | O69  | 1.859 |
| O70  | 2.196 | O71  | 1.609 | O72  | 2.089 |
| O73  | 2.032 | O74  | 1.993 | O75  | 1.708 |
| O76  | 1.842 | O77  | 2.081 | O78  | 1.910 |
| O79  | 1.889 | O80  | 1.828 | O81  | 1.960 |
| O82  | 1.798 | O83  | 2.166 | O84  | 1.904 |
| O85  | 1.909 | O86  | 1.885 | O87  | 1.783 |
| O88  | 1.830 | O89  | 1.860 | O90  | 1.857 |
| O91  | 2.112 | O92  | 1.867 | O93  | 1.806 |
| O94  | 1.807 | O95  | 1.750 | O96  | 1.825 |
| O97  | 2.066 | O98  | 1.988 | O99  | 1.936 |
| O100 | 1.591 | O101 | 1.703 | O102 | 1.613 |
| O103 | 2.012 | O104 | 1.466 | O105 | 1.703 |
| O106 | 1.749 | O107 | 1.919 | O108 | 1.904 |
| O109 | 1.847 | O110 | 1.890 | O111 | 1.745 |
| O112 | 1.613 | O113 | 1.750 | O114 | 1.703 |

|      |       |      |       |      |       |
|------|-------|------|-------|------|-------|
| O115 | 1.749 | O116 | 1.847 | O117 | 1.786 |
| O118 | 1.926 | O119 | 1.898 | O120 | 1.657 |
| O121 | 1.955 | O122 | 1.957 | O123 | 1.855 |
| O124 | 1.613 | O125 | 1.964 | O126 | 1.865 |
| O127 | 1.587 | O1W  | 0.262 | O2W  | 0.284 |
| O3W  | 0.270 |      |       |      |       |

**Table S2.** The results of BVS calculations of all O atoms in **2a**.

| Atom | BVS   | Atom | BVS   | Atom | BVS   |
|------|-------|------|-------|------|-------|
| O1   | 1.897 | O2   | 1.963 | O3   | 1.959 |
| O4   | 2.050 | O5   | 1.852 | O6   | 1.935 |
| O7   | 1.898 | O8   | 1.984 | O9   | 2.011 |
| O10  | 1.987 | O11  | 1.976 | O12  | 2.181 |
| O13  | 1.942 | O14  | 2.066 | O15  | 1.933 |
| O16  | 2.094 | O17  | 1.613 | O18  | 2.181 |
| O19  | 2.120 | O20  | 1.882 | O21  | 2.420 |
| O22  | 2.097 | O23  | 2.094 | O24  | 1.749 |
| O25  | 2.054 | O26  | 2.094 | O27  | 1.875 |
| O28  | 1.657 | O29  | 2.291 | O30  | 2.105 |
| O31  | 1.797 | O32  | 2.068 | O33  | 1.962 |
| O34  | 2.071 | O35  | 2.064 | O36  | 1.703 |
| O37  | 1.858 | O38  | 2.171 | O39  | 1.924 |
| O40  | 1.798 | O41  | 1.907 | O42  | 1.910 |
| O43  | 1.825 | O44  | 2.049 | O45  | 1.997 |
| O46  | 1.847 | O47  | 2.020 | O48  | 1.749 |
| O49  | 1.963 | O50  | 1.987 | O51  | 2.066 |
| O52  | 1.658 | O53  | 1.857 | O54  | 2.132 |
| O55  | 1.815 | O56  | 1.965 | O57  | 2.131 |
| O58  | 1.776 | O59  | 1.897 | O60  | 1.832 |
| O61  | 2.007 | O62  | 1.824 | O63  | 2.097 |
| O64  | 2.094 | O65  | 2.083 | O66  | 1.955 |
| O67  | 2.330 | O68  | 1.749 | O69  | 1.944 |
| O70  | 1.703 | O71  | 2.155 | O72  | 1.965 |
| O73  | 2.254 | O74  | 1.749 | O75  | 1.858 |
| O76  | 1.959 | O77  | 1.854 | O78  | 2.010 |
| O79  | 1.897 | O80  | 2.025 | O81  | 1.657 |
| O82  | 2.204 | O83  | 1.874 | O84  | 2.293 |
| O85  | 2.000 | O86  | 1.995 | O87  | 1.934 |
| O88  | 1.749 | O89  | 1.449 | O90  | 1.963 |
| O91  | 1.749 | O92  | 1.570 | O93  | 1.978 |
| O94  | 0.995 | O95  | 2.015 | O96  | 2.097 |
| O97  | 1.749 | O98  | 1.962 | O99  | 1.788 |
| O100 | 2.332 | O101 | 1.968 | O102 | 1.847 |
| O103 | 2.057 | O104 | 1.932 | O105 | 2.165 |
| O106 | 1.987 | O107 | 1.932 | O108 | 1.897 |
| O109 | 1.915 | O110 | 1.959 | O111 | 2.196 |
| O112 | 1.750 | O113 | 2.064 | O114 | 2.066 |
| O115 | 1.613 | O116 | 1.965 | O117 | 2.131 |
| O118 | 1.883 | O119 | 1.703 | O120 | 1.905 |
| O121 | 1.602 | O122 | 2.181 | O123 | 1.847 |
| O124 | 1.932 | O125 | 1.867 | O126 | 1.898 |
| O127 | 1.852 | O128 | 1954  | O129 | 1.897 |

|      |       |      |       |      |       |
|------|-------|------|-------|------|-------|
| O130 | 2.108 | O131 | 2.477 | O132 | 2.124 |
| O133 | 1.703 | O134 | 2.043 | O135 | 2.211 |
| O136 | 1.984 | O137 | 1.750 | O138 | 1.984 |
| O139 | 2.052 | O140 | 1.965 | O141 | 1.948 |
| O142 | 1.986 | O143 | 1.487 | O144 | 2.214 |
| O145 | 1.937 | O146 | 2.002 | O147 | 1.822 |
| O148 | 1.978 | O149 | 2.088 | O150 | 2.057 |
| O151 | 1.934 | O152 | 2.114 | O153 | 1.897 |
| O154 | 2.103 | O155 | 2.150 | O156 | 1.798 |
| O157 | 1.750 | O158 | 2.122 | O159 | 2.205 |
| O160 | 2.011 | O161 | 2.011 | O162 | 1.897 |
| O163 | 2.078 | O164 | 1.657 | O165 | 2.066 |
| O166 | 2.021 | O167 | 1.657 | O168 | 1.719 |
| O169 | 1.954 | O170 | 2.012 | O171 | 2.028 |
| O172 | 1.098 | O173 | 1.966 | O174 | 1.954 |
| O175 | 1.981 | O176 | 2.119 | O177 | 2.195 |
| O178 | 1.984 | O179 | 1.905 | O180 | 2.095 |
| O181 | 2.058 | O182 | 2.292 | O183 | 2.002 |
| O184 | 1.914 | O185 | 1.864 | O186 | 1.833 |
| O187 | 1.749 | O188 | 2.068 | O189 | 1.990 |
| O190 | 1.949 | O191 | 2.062 | O192 | 1.860 |
| O193 | 1830  | O194 | 1.898 | O195 | 2.034 |
| O196 | 1.949 | O197 | 2.163 | O198 | 2.068 |
| O199 | 1.798 | O200 | 1.843 | O201 | 1.934 |
| O202 | 1.570 | O203 | 2.075 | O204 | 2.330 |
| O205 | 1.847 | O206 | 2.052 | O1W  | 0.335 |
| O2W  | 0.308 | O3W  | 0.326 | O4W  | 0.353 |
| O5W  | 0.394 | O6W  | 0.373 | O7W  | 0.292 |
| O8W  | 0.300 | O9W  | 0.415 | O10W | 0.344 |
| O11W | 0.394 | O12W | 0.309 | O14W | 0.404 |
| O15W | 0.269 | O16W | 0.394 | O17W | 0.335 |
| O18W | 0.262 | O19W | 0.326 | O20W | 0.332 |
| O48W | 0.262 |      |       |      |       |

**Table S3.** Comparison of some POM-based catalysts for the catalytic oxidation of MPS with **2**.

| Compounds                                                                                                                                                                | Time (min) | Temp(°C) | Conve (%) | Sel (%) | Ref. |
|--------------------------------------------------------------------------------------------------------------------------------------------------------------------------|------------|----------|-----------|---------|------|
| $[\text{Ce}_2(\text{H}_2\text{O})_6(\text{DMEA})\text{W}_4\text{O}_9(\alpha\text{-SeW}_9\text{O}_{33})_3]^{12-}$                                                         | 60         | 40       | 100       | 100     | 3    |
| $[\text{Ce}_2\text{W}_4\text{O}_9(\text{H}_2\text{O})_7(\text{SeW}_9\text{O}_{33})_2]^{24-}$                                                                             | 60         | 40       | 100       | 100     | 3    |
| $[\text{Zr}_{24}\text{O}_{22}(\text{OH})_{10}(\text{H}_2\text{O})_2(\text{W}_2\text{O}_{10}\text{H})_2(\text{GeW}_9\text{O}_{34})_4(\text{GeW}_8\text{O}_{31})_2]^{32-}$ | 60         | 60       | 99        | 84      | 4    |
| $[\text{Ln}_3(\text{H}_2\text{O})_{14}\{(\text{Mo}_6\text{O}_{24})(\text{O}_3\text{PCH}_2\text{COO})_3\}_2]^{9-}$                                                        | 60         | 50       | 100       | 99.7    | 5    |
| $[\text{As}_4\text{W}_{40}\text{O}_{140}\{\text{Ru}_2(\text{CH}_3\text{COO})\}_2]^{14-}$                                                                                 | 60         | 50       | 100       | 100     | 6    |
| $\{\text{Ti}_7\text{O}_6(\text{SbW}_9\text{O}_{33})_4\}_2^{40-}$                                                                                                         | 60         | 50       | 100       | 100     | 7    |
| $\{[\text{Re}(\text{CO})_3]_4(\text{Mo}_4\text{O}_{16})\}_4^{4-}$                                                                                                        | 60         | 35       | 99        | 100     | 8    |
| $[\text{Na}_5\text{Sb}_3(\text{Sb}_2\text{Mo}_{12}\text{O}_{57})]^{12-}$                                                                                                 | 60         | 25       | 100       | 100     | 9    |



|                                                                                                                |    |    |     |     |            |
|----------------------------------------------------------------------------------------------------------------|----|----|-----|-----|------------|
| $\{[W_2Nd_2(H_2O)_8O_6(OH)_2(\beta-Se_2W_{14}O_{52})][W_3Nd_2(H_2O)_6O_7(\beta-\alpha-SeW_9O_{33})_2]\}^{20-}$ | 10 | 35 | 100 | 100 | This paper |
|----------------------------------------------------------------------------------------------------------------|----|----|-----|-----|------------|

- 1 G. M. Sheldrick, SHELXL 97, Program for Crystal Structure Refinement; University of Göttingen: Göttingen, Germany, 1997.
- 2 G. M. Sheldrick, SHELXS 97, Program for Crystal Structure Solution; University of Göttingen: Göttingen, Germany, 1997.
- 3 H.-L. Li, C. Lian, L.-J. Chen, J.-W. Zhao and G.-Y. Yang, *Inorg. Chem.*, 2019, **58**, 8442–8450.
- 4 L. Huang, S.-S. Wang, J.-W. Zhao, L. Cheng and G.-Y. Yang, *J. Am. Chem. Soc.*, 2014, **136**, 7637–7642.
- 5 J. W. Wang, Y. J. Niu, M. Zhang, P. T. Ma, C. Zhang, J. Y. Niu and J. P. Wang, *Inorg. Chem.*, 2018, **57**, 1796–1805.
- 6 M. D. Han, Y. J. Niu, R. Wan, Q. F. Xu, J. K. Lu, P. T. Ma, C. Zhang, J. Y. Niu and J. P. Wang, *Chem. Eur. J.*, 2018, **24**, 11059–11066.
- 7 H.-L. Li, C. Lian, D.-P. Yin, Z.-Y. Jia and G.-Y. Yang, *Cryst. Growth Des.*, 2019, **19**, 376–380.
- 8 J. K. Lu, X. Y. Ma, V. Singh, Y. J. Zhang, P. T. Ma, C. Zhang, J. Y. Niu and J. P. Wang, *Dalton Trans.*, 2018, **47**, 5279–5285.
- 9 J. K. Lu, Y. P. Wang, X. Y. Ma, Y. J. Niu, V. Singh, P. T. Ma, C. Zhang, J. Y. Niu and J. P. Wang, *Dalton Trans.*, 2018, **47**, 8070–8077.
